# Supplementary material for: Targeting Oxidative Phosphorylation-Proteasome Activity in Extracellular Detached Cells Promotes Anoikis and Inhibits Metastasis
Source: MDPI journal article supplement (doi:10.3390/life12010042), 2021-12-28
Supplement: s1 [file s1]

# Targeting Oxidative Phosphorylation-Proteasome Activity in Extracellular Detached Cells Promotes Anoikis and Inhibits Metastasis

## Supplementary material

Table S1. Primer sequences for the quantitative PCR.

| S/N | GENE            | FORWARD-F AND REVERSE-R                                |
|-----|-----------------|--------------------------------------------------------|
| 1   | PSMA4           | F- TCCGTGGACATCTCAGGTCT<br>R- TGGTATAAGCGACCTTCTGGAG   |
| 2   | PSMB2           | F- ATCTTCGCTCTGAGGTGCTG<br>R- TTGTCATGATCGATGAGGTACTCC |
| 3   | PSMD1           | F- GGCCAAGTTTGCGCTATTC<br>R- TGAACTTTCGGCATCTTTAAGTCC  |
| 4   | PSMD3           | F- ACCTCTACTACACAGGGCGA<br>R- AACAGCTCCACCACGATGAG     |
| 4   | AMPK $\alpha$ 1 | F- CTCCACGAAGGAGCTGGATG<br>R- TCTGGTGCAGCATAGTTGGG     |
| 5   | AMPK $\alpha$ 2 | F- TGAGAAGCAGAAGCACGACGG<br>R- AACTGCCACTTATGGCCTGTTA  |
| 6   | GPX1            | F- CCAGTTTGGGCATCAGGAGAA<br>R- AGCATGAAGTTGGGCTCGAA    |
| 7   | GPX2            | F- GACTTCACCCAGCTCAACGA<br>R- ATGCTCGTTCTGCCATTCA      |
| 8   | GPX3            | F- AGAAGTCGAAGATGGACTGCC<br>R- GCAGGGAAAAGCCCAGAATGA   |
| 9   | SOD1            | F- GCAGGGAAAAGCCCAGAATGA<br>R- AACGACTTCCAGCGTTTCCT    |
| 10  | SOD2            | F- GGCCTACGTGAACAACCTGA<br>R- GTTCTCCACCACGTTAGGG      |
| 11  | SOD3            | F- GATCCGAGACATGTACGCCA<br>R- GAAGAAGGCGTCGAGCTTGG     |
| 12  | B-Actin         | F- ATTGGCAATGAGCGGTTCCG<br>R- AGGGCAGTGATCTCCTTCTG     |

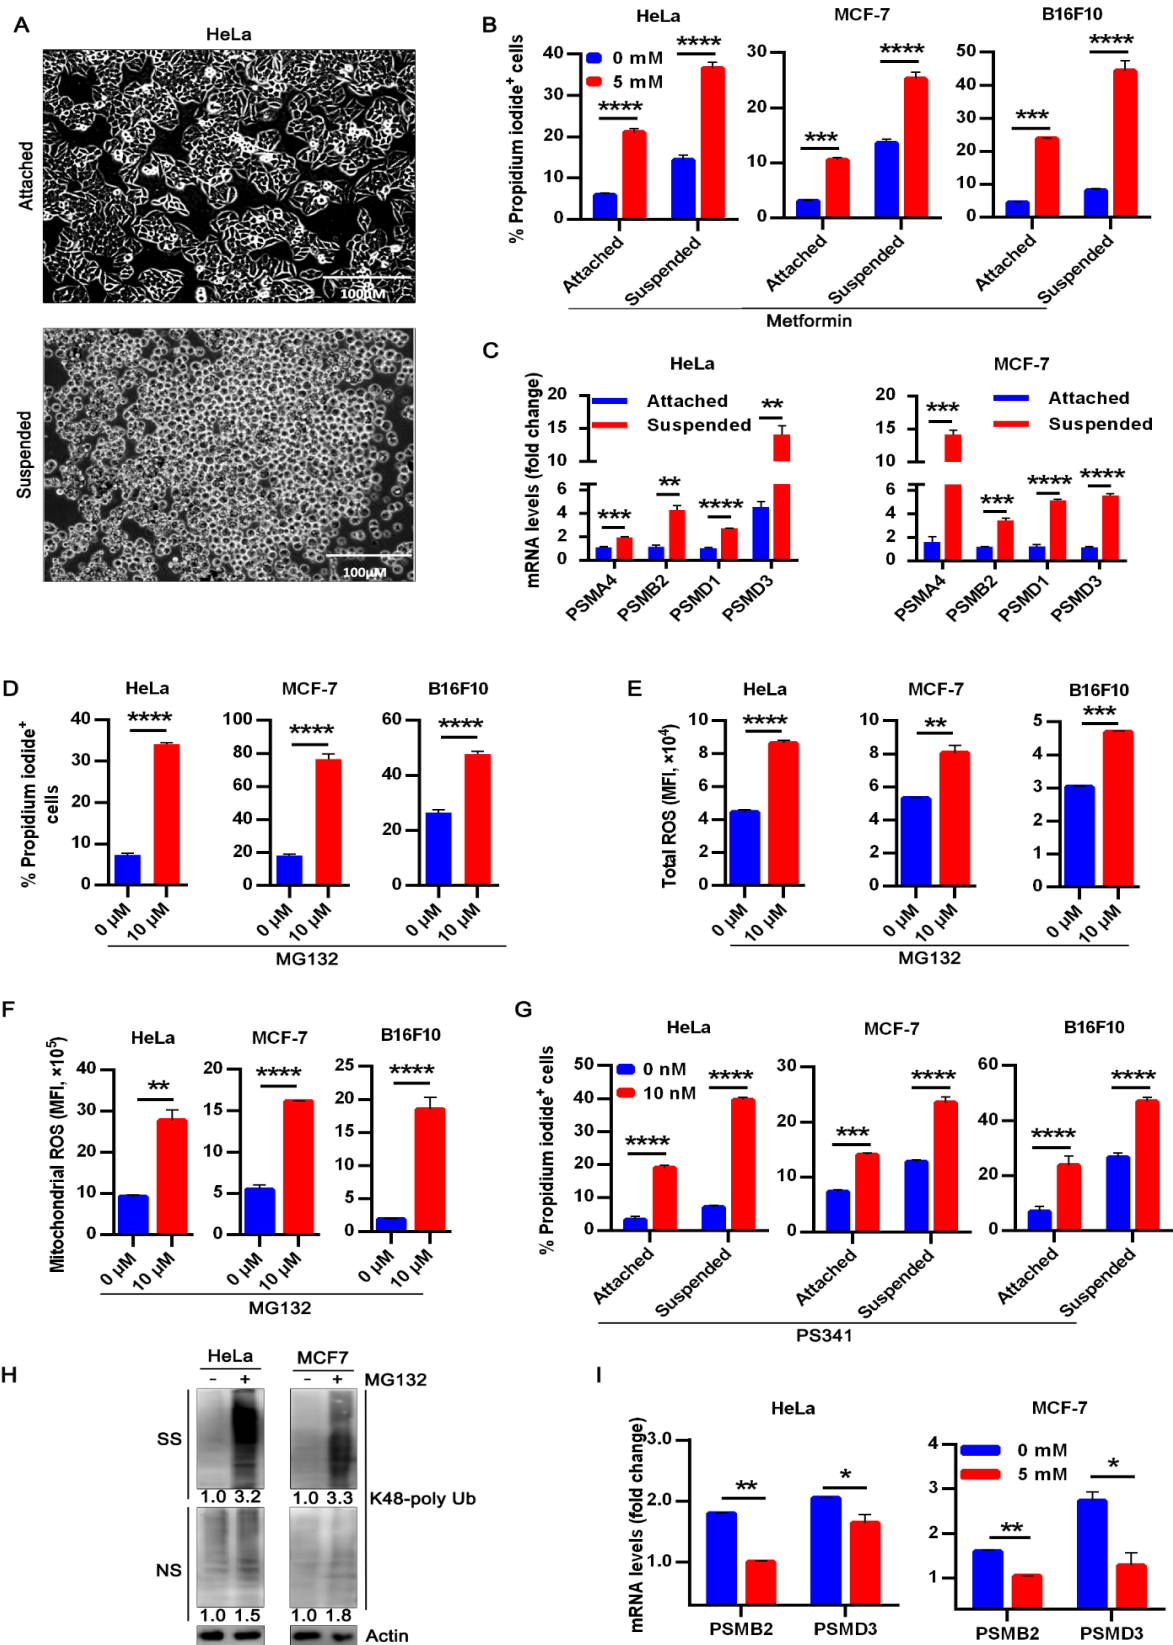

**Figure S1. Proteasome inhibition sensitizes tumor cells to anoikis.** (A) Phase-contrast microscopic images of HELA cultured in normal (attached) and polyhema pre-coated (suspended) dishes; (B) Percentage apoptotic HeLa, MCF-7, and B16F10 treated with Metformin in ECM attached or detached condition; (C) RT-qPCR relative mRNA expression of proteasome genes in HeLa and MCF-7 cultured for 24 hours as adherent or suspension cells. (D) Flow cytometry percentage propidium iodide+ HeLa, MCF-7, and B16F10 treated with 10  $\mu$ M MG132 in ECM detached condition for 24 hours. (E) Flow cytometry quantification of total ROS measured as mean fluorescence intensity in MG132 treatment of HeLa, MCF-7, and B16F10 stained with CM-H2DCFDA. (F) Flow cytometry mean fluorescence intensity quantification of mitochondria ROS in HeLa, MCF-7, and B16F10 cells after MG132 treatment for 24 hours. (G) Percentage apoptotic HeLa, MCF-7, and B16F10 treated with PS341 in ECM attached or detached condition. (H) Blot of K48 polyUb-transformed proteins in MG132 treatment of HeLa and MCF-7, NS and SS portions are presented. NS – NP40 soluble portion, SS – SDS soluble portion. (I) Effect of metformin treatment on the relative mRNA content of some proteasome genes after 24 hours of treatment of HeLa and MCF-7 measured by RT-qPCR. All result are mean SEM, (n=3), \*  $p < 0.05$ , \*\*  $p < 0.01$ , \*\*\*  $p < 0.001$  \*\*\*\* $p < 0.0001$ , ns, not significant difference.

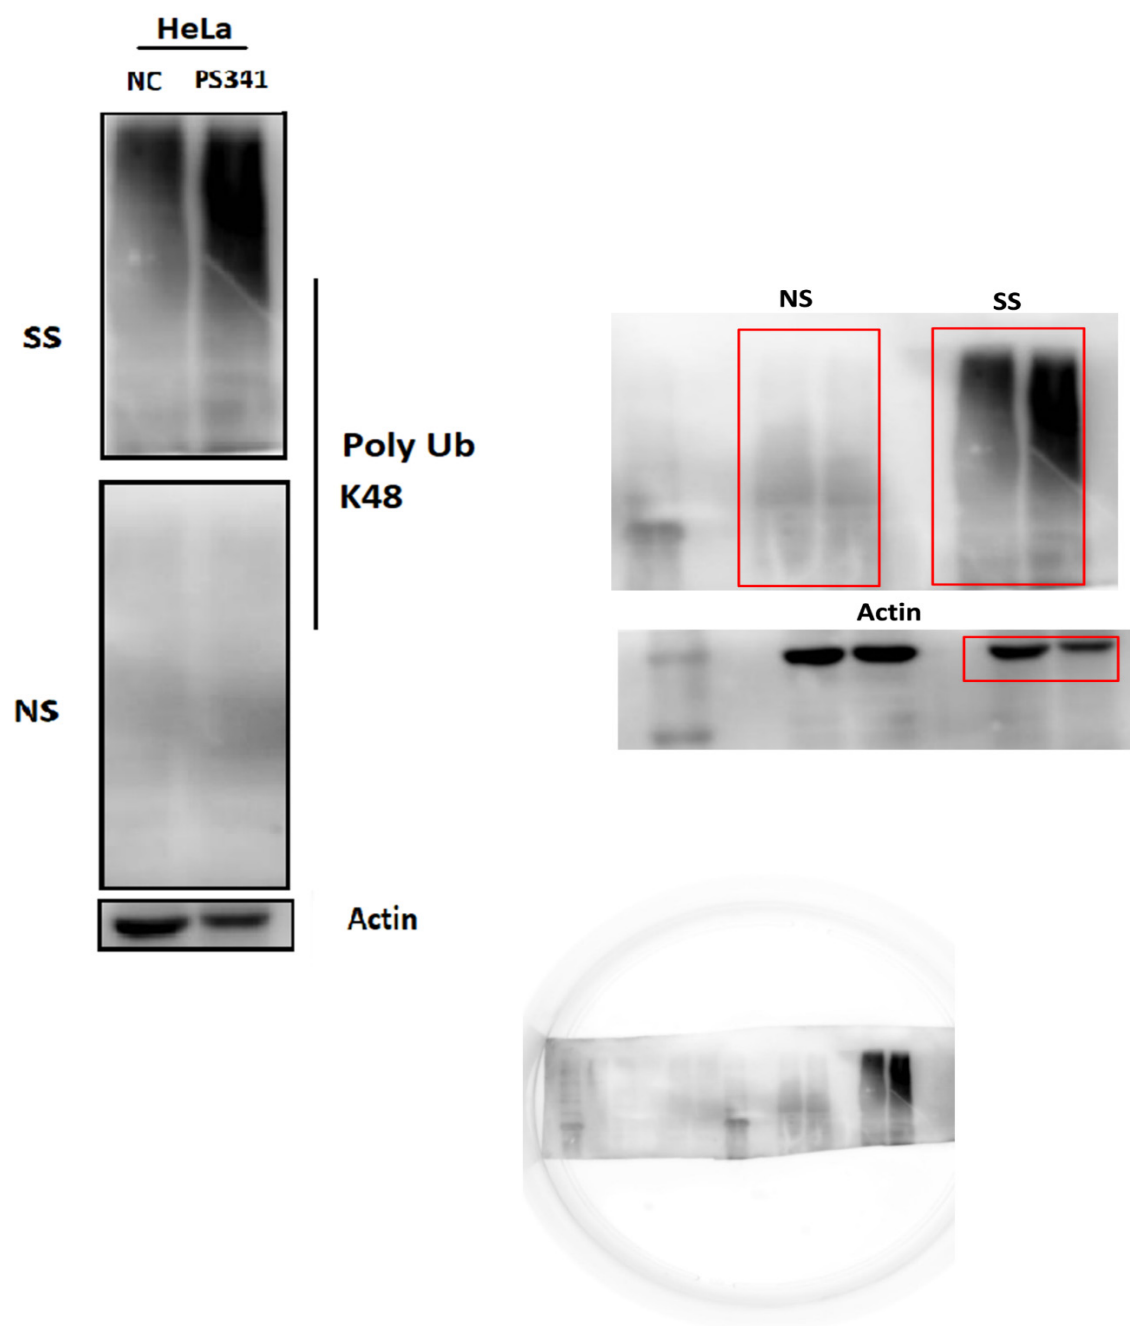

**Figure S2.** The original western blot for Figure 3E lysate of HeLa treated with PS341, showing Poly Ub K48.

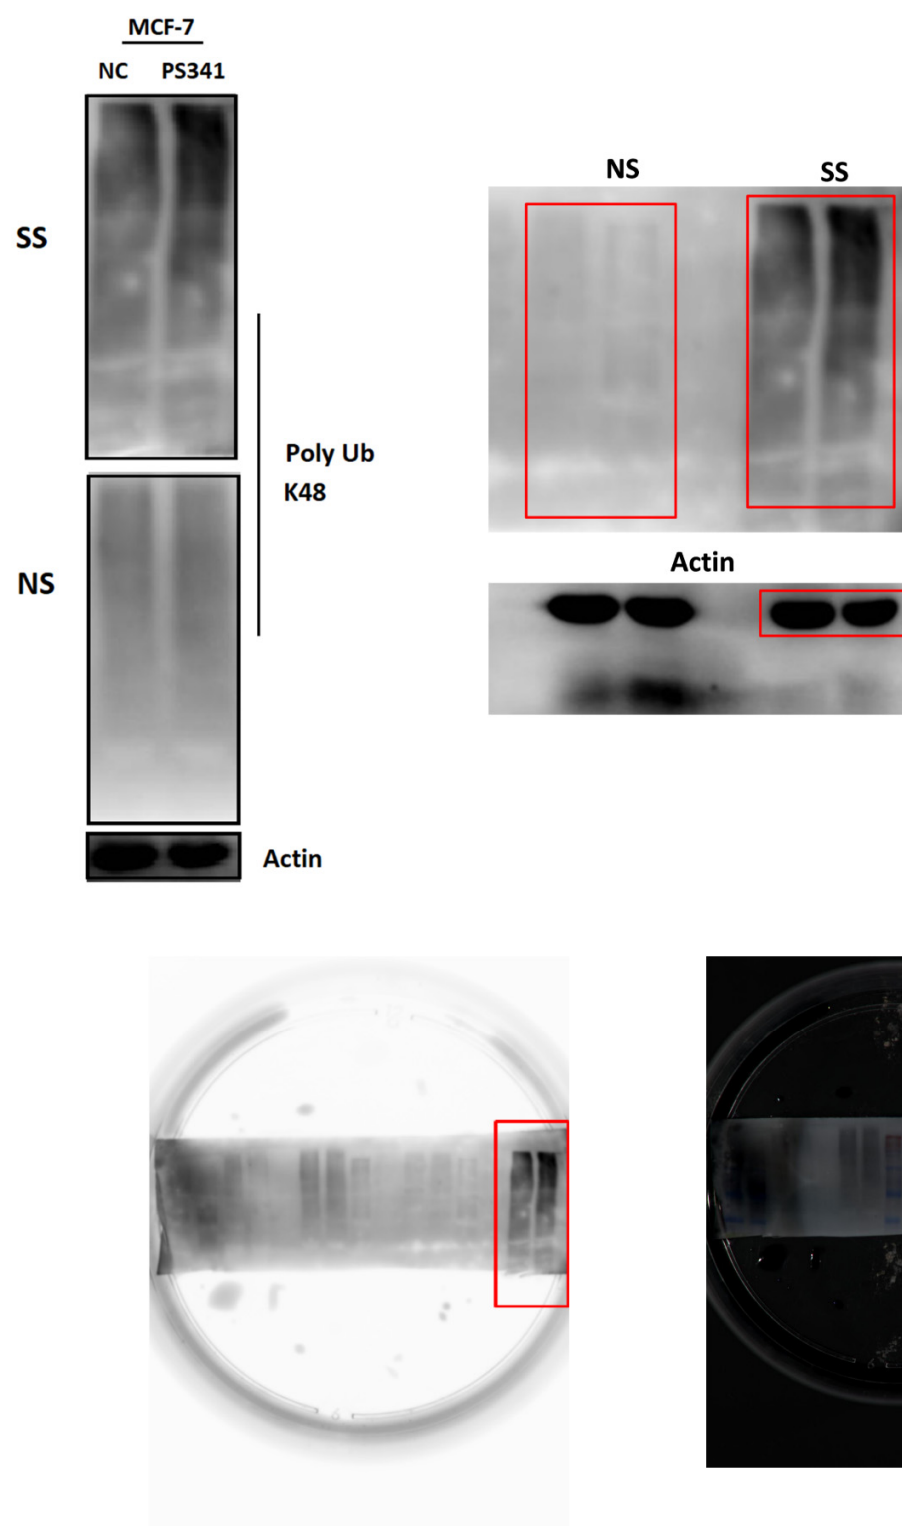

**Figure S3.** The uncropped western blot images for Figure 3E lysate of MCF-7 treated with PS341, showing Poly Ub K48.

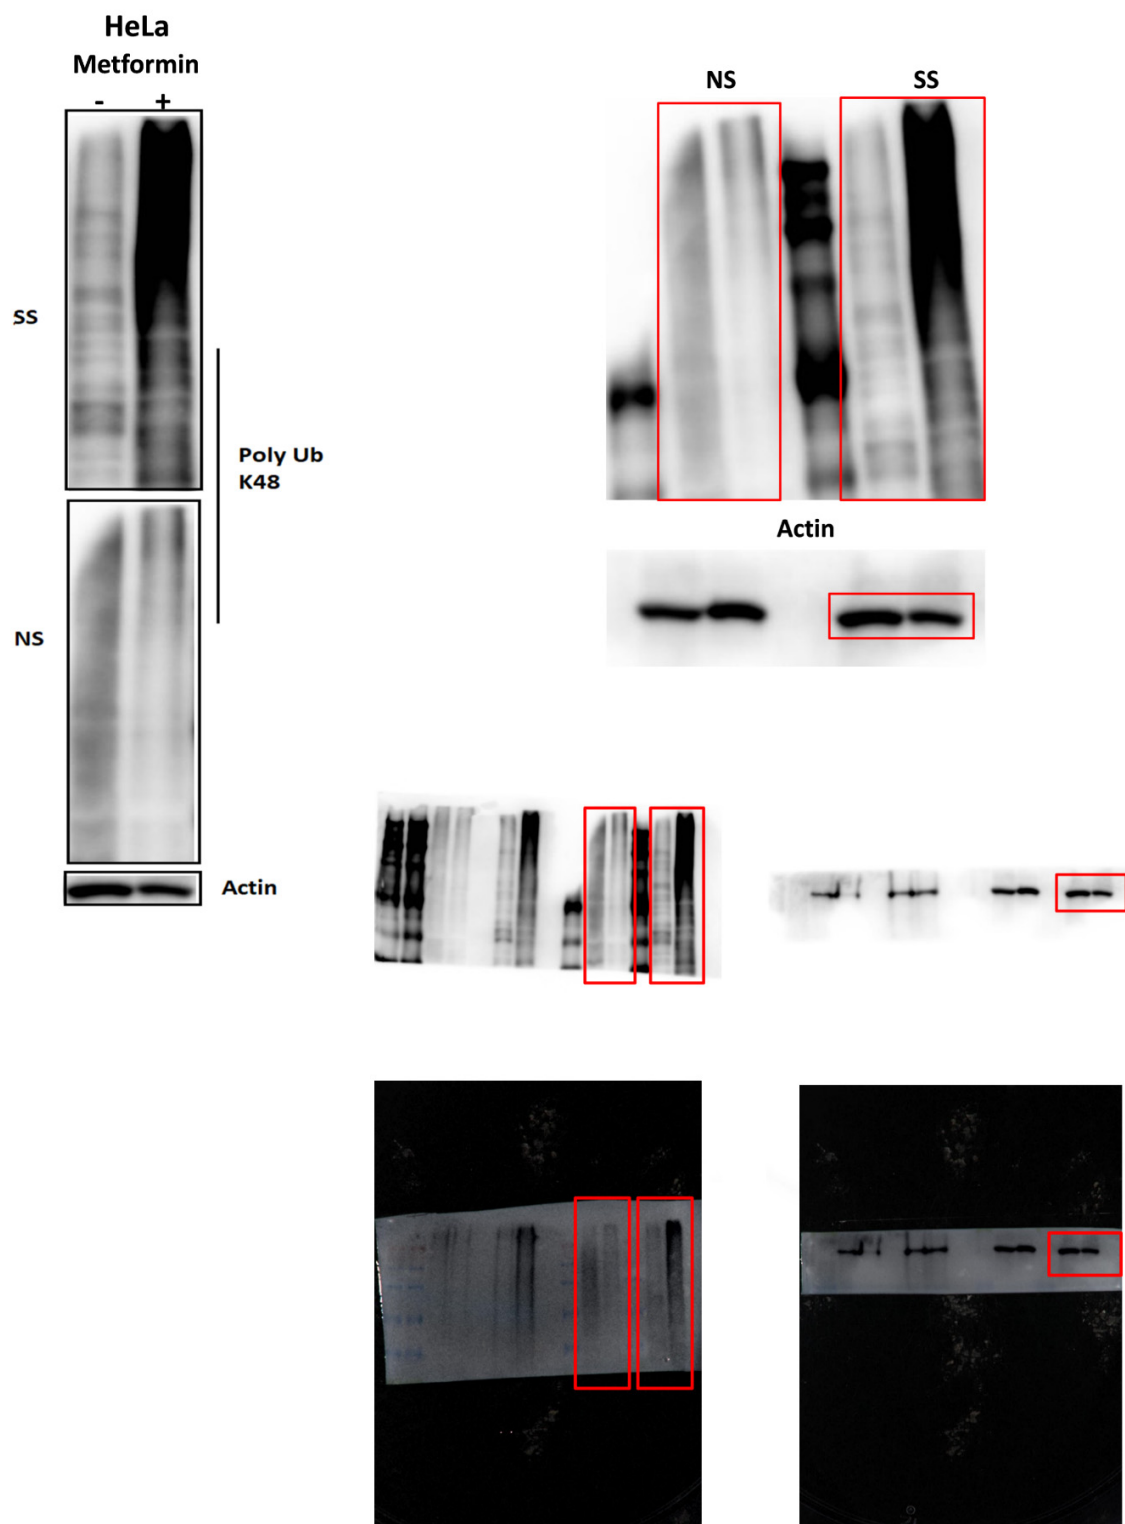

**Figure S4.** The original western blot images for Figure 3G lysate of HeLa treated with metformin, showing Poly Ub K48 and Actin.

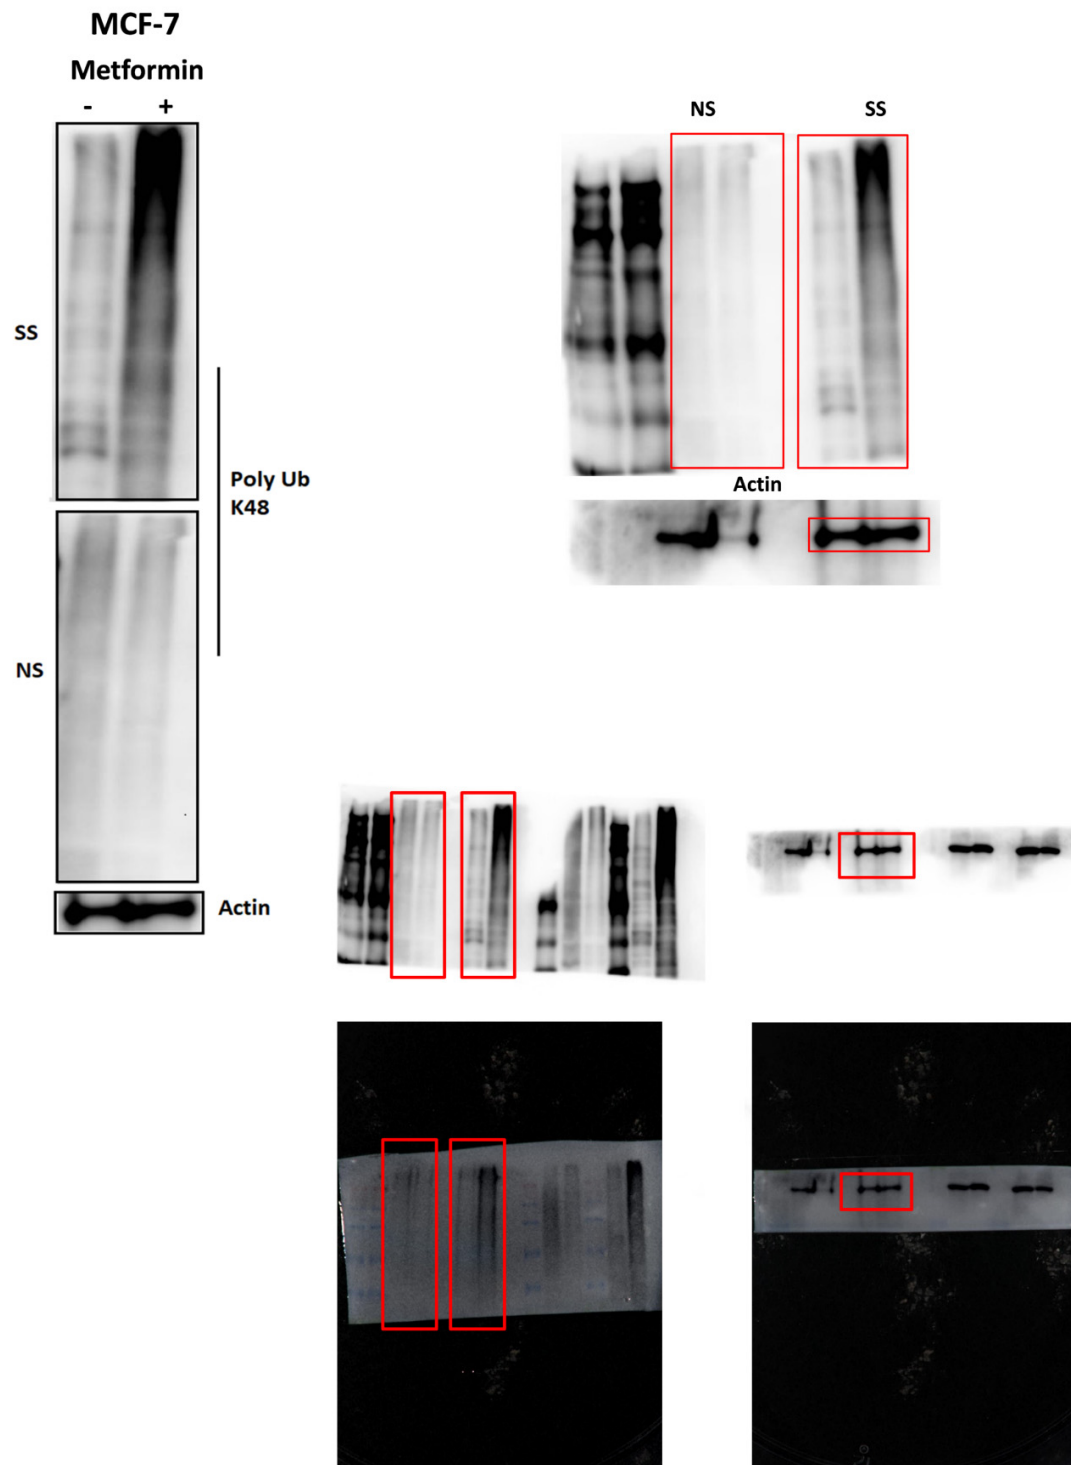

**Figure S5.** The uncropped western blot images for Figure 3G lysate of MCF-7 treated with metformin, showing Poly Ub K48 and Actin.

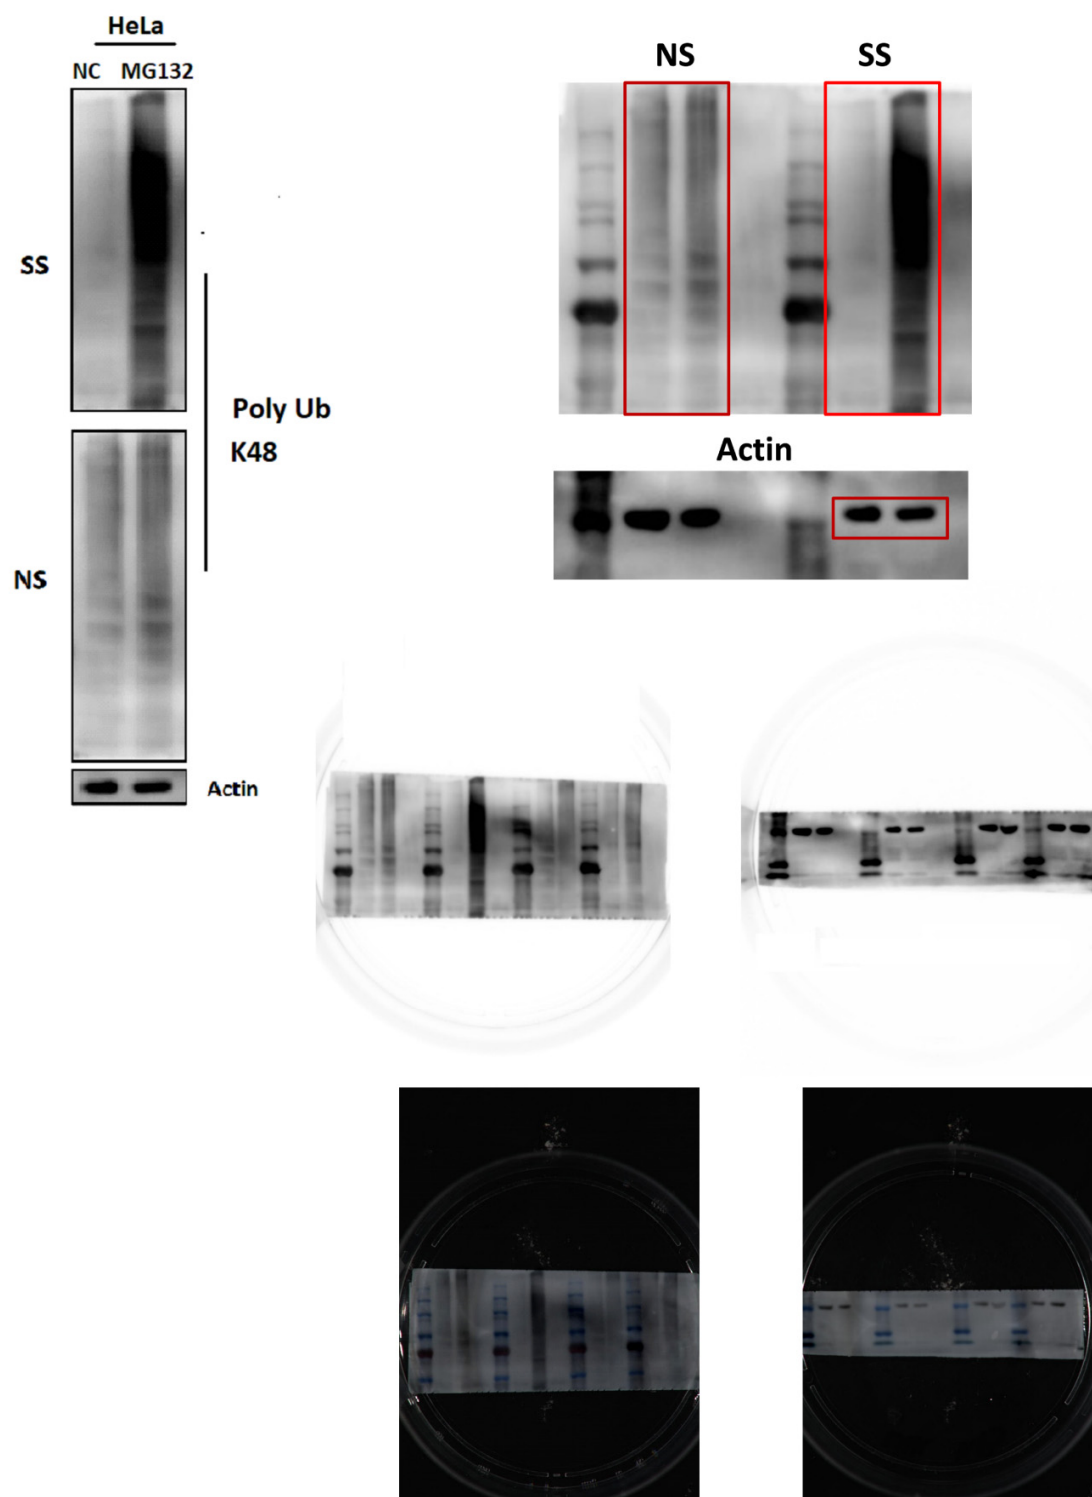

**Figure S6.** The uncropped western blot images of Suppl Figure 1E lysate of HeLa treated with MG132, showing Poly Ub K48 and Actin.



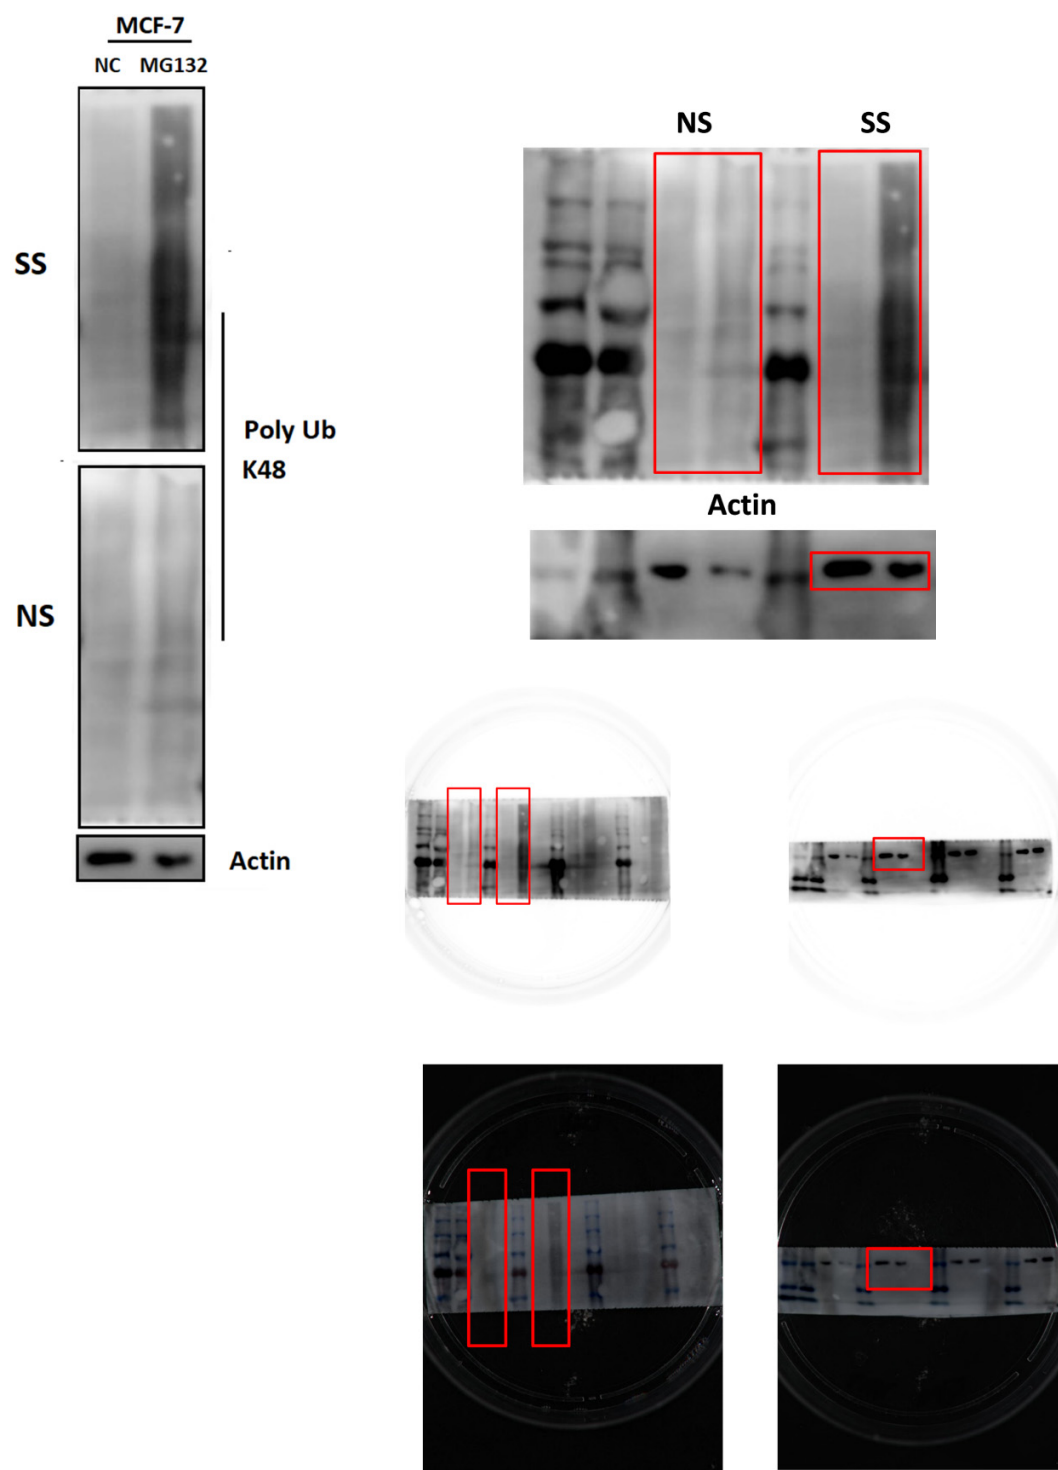

**Figure S7.** The uncropped western blot images of Suppl Figure 1E lysate of MCF-7 treated with MG132, showing Poly Ub K48 and Actin.

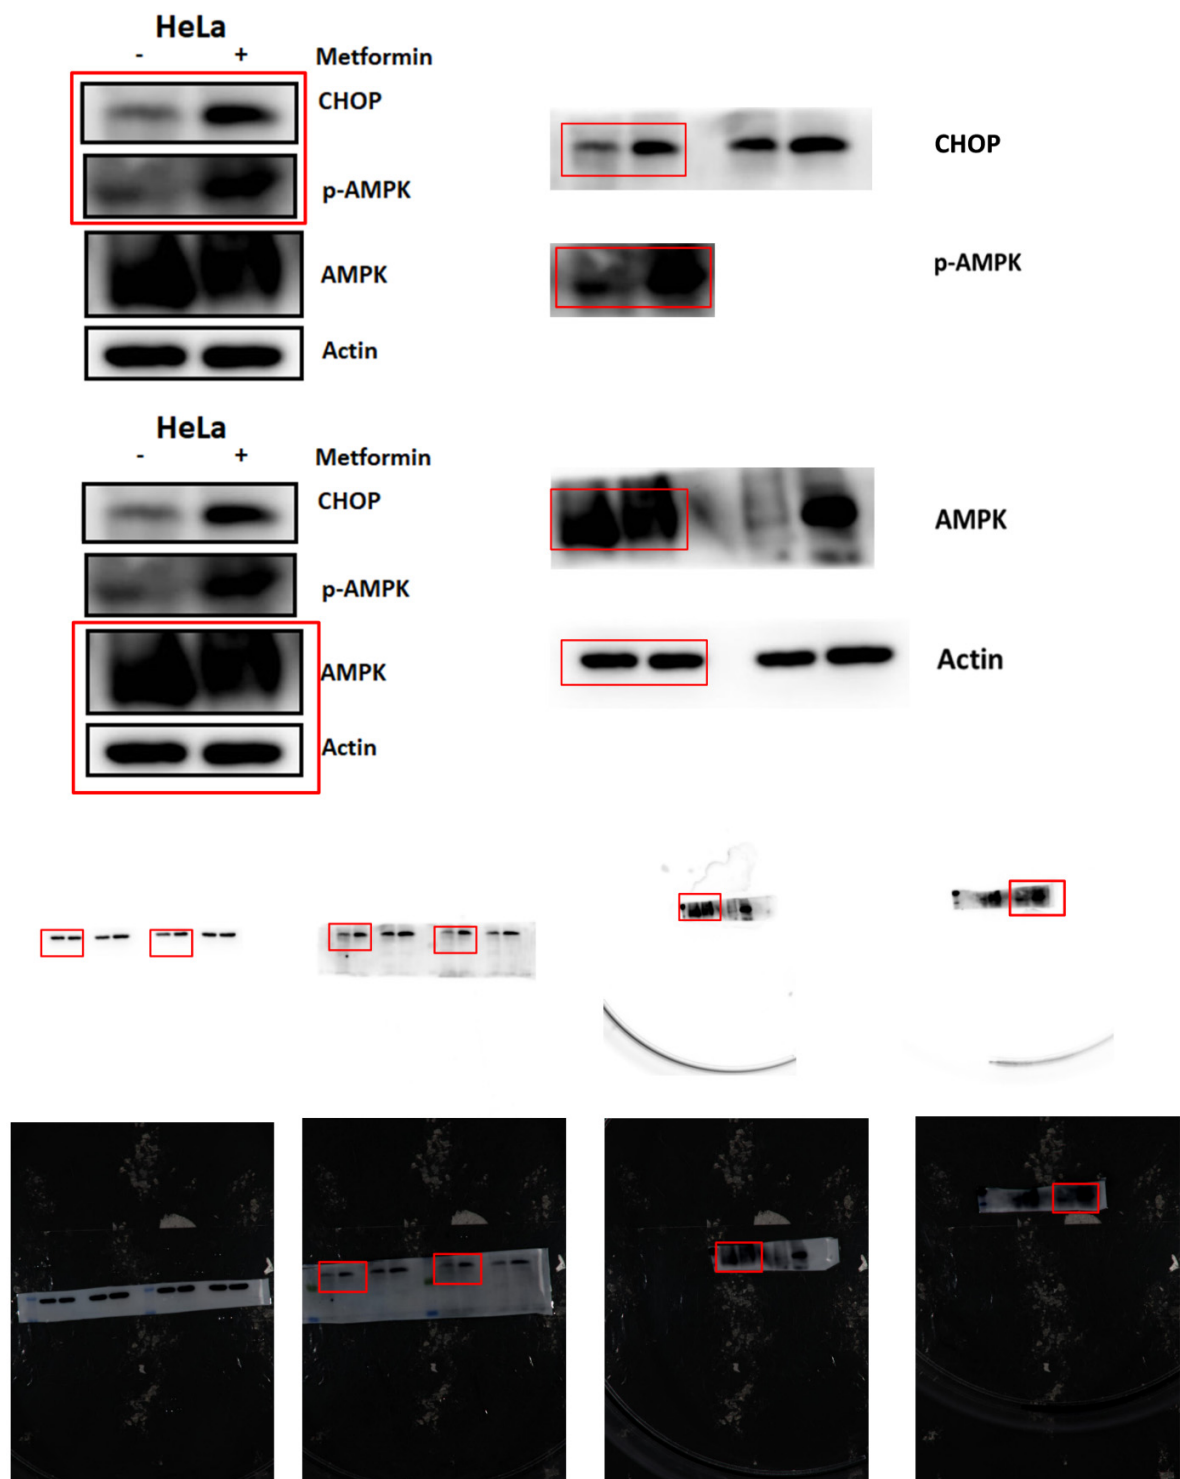

**Figure S8.** The original western blot images for Figure 4A, lysate of HeLa treated with metformin; CHOP, P-AMPK, AMPK and Actin.



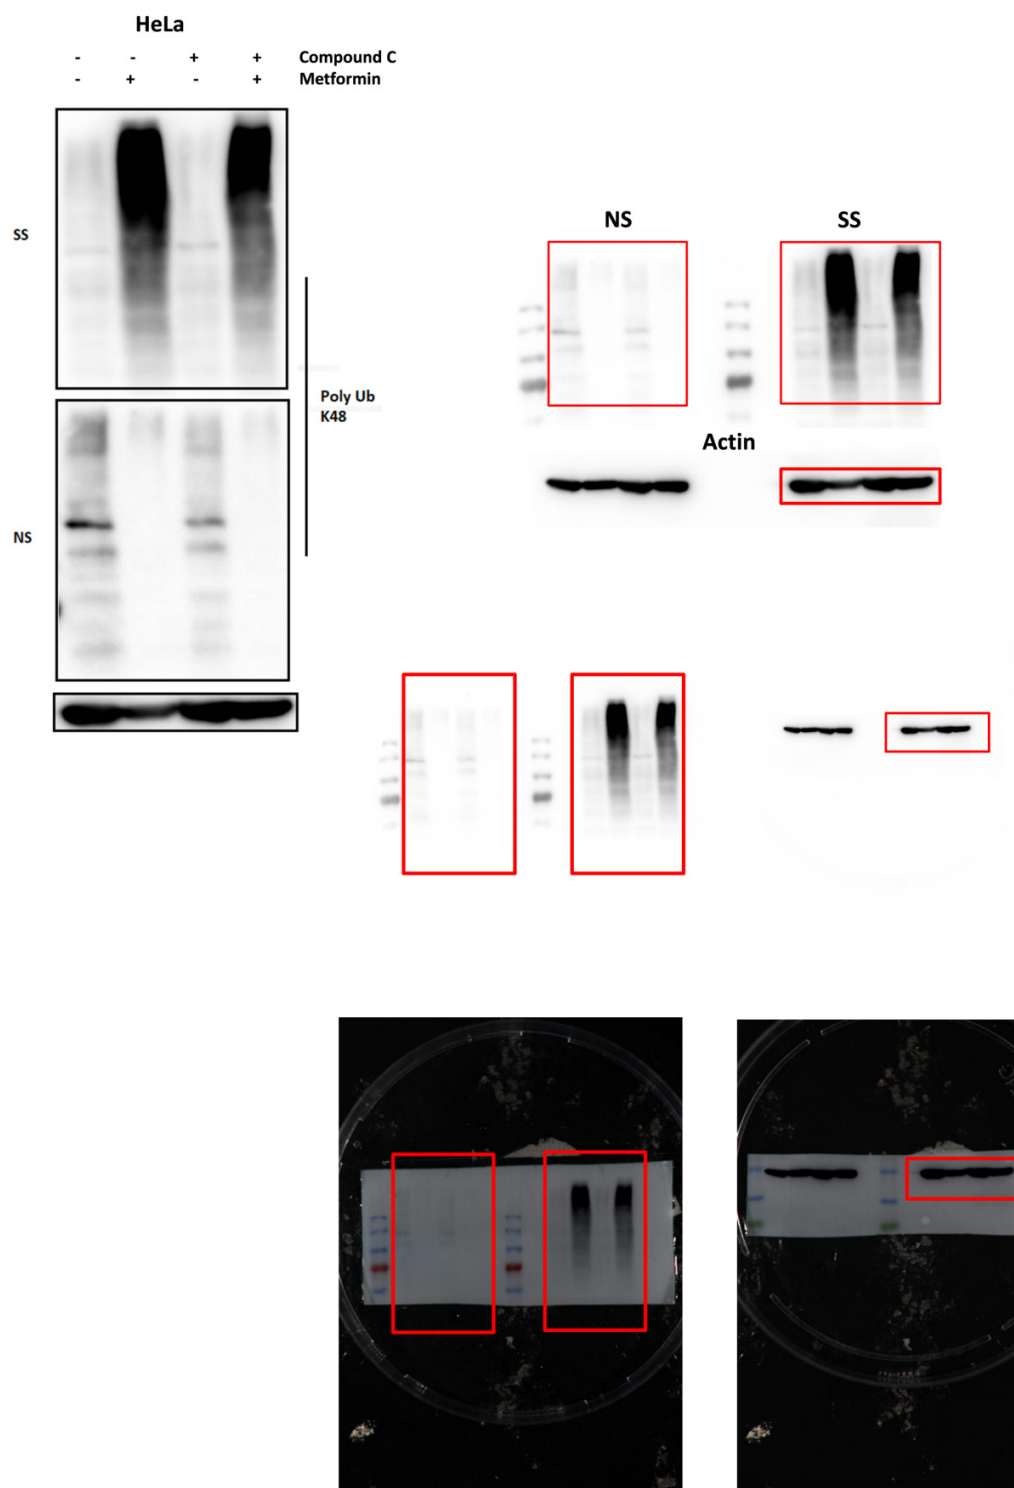

**Figure S10.** The original western blot images for Figure 4G lysate of HeLa treated with metformin with or without compound C, showing Poly Ub K48 and Actin.

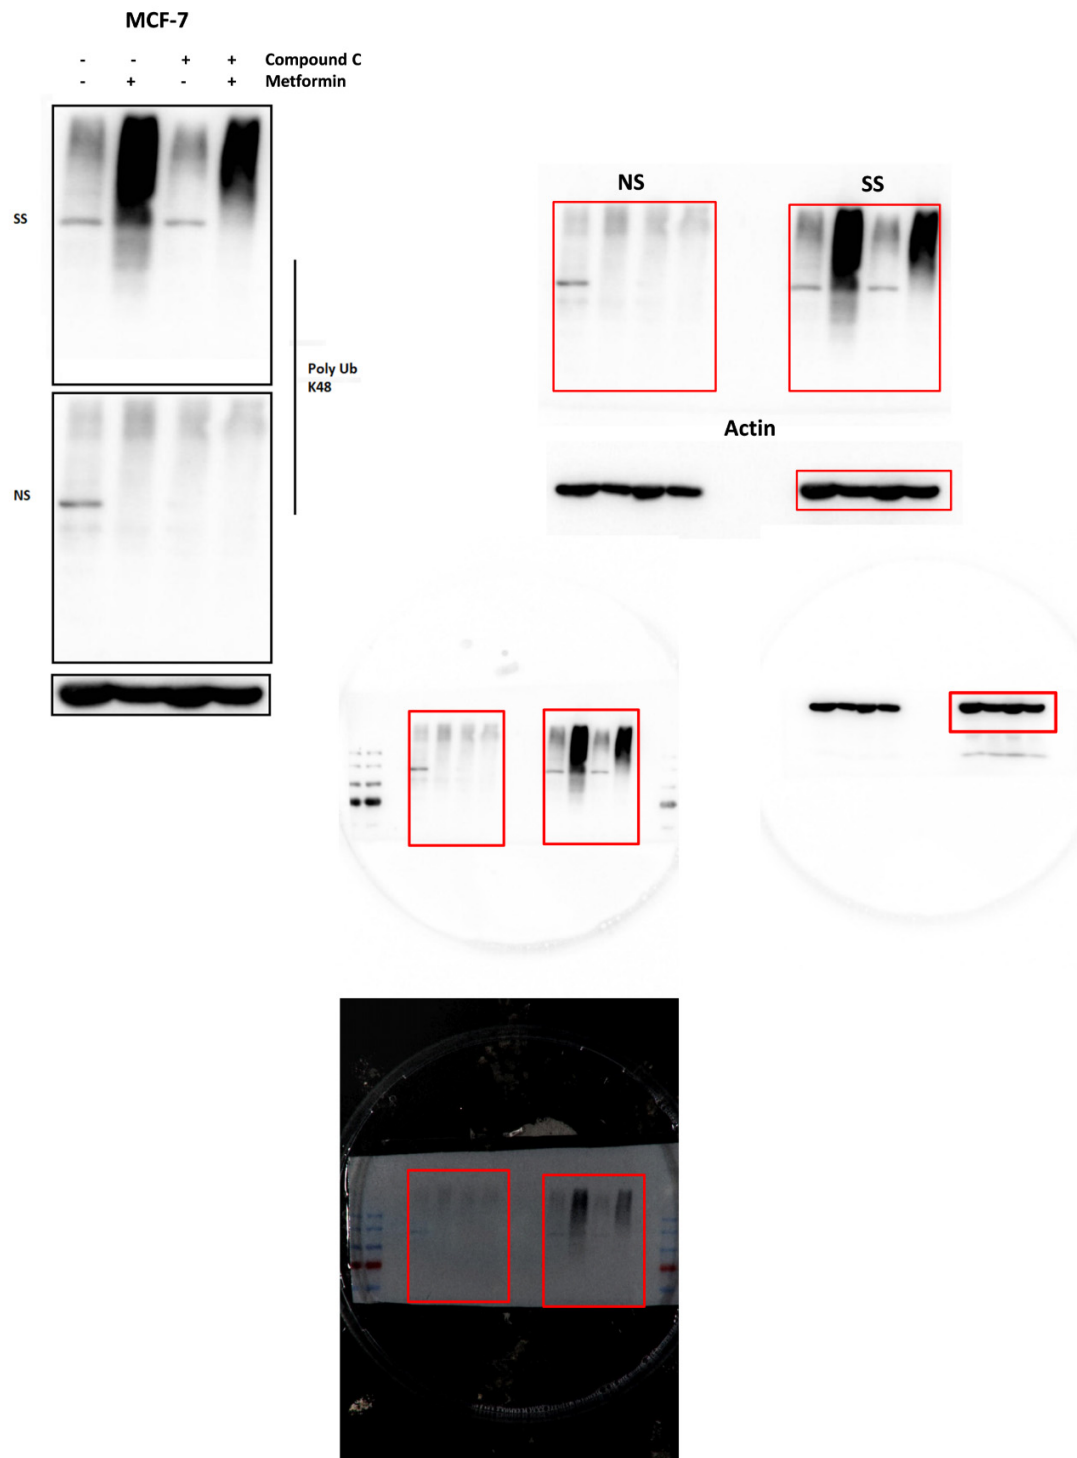

**Figure S11.** The original western blot images for Figure 4G lysate of MCF-7 treated with metformin with or without compound C, showing Poly Ub K48 and Actin.
